# Supplementary material for: The generation of gridded emissions data for CMIP6
Source: Copernicus journal article supplement (doi:10.5194/gmd-13-461-2020), 2020-02-06
Supplement: Supplementary file [file gmd-13-461-2020-supplement.pdf]

Supplement of Geosci. Model Dev., 13, 461–482, 2020  
<https://doi.org/10.5194/gmd-13-461-2020-supplement>  
© Author(s) 2020. This work is distributed under  
the Creative Commons Attribution 4.0 License.

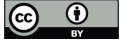

*Supplement of*

## **The generation of gridded emissions data for CMIP6**

**Leyang Feng et al.**

*Correspondence to:* Steven J. Smith ([ssmith@pnnl.gov](mailto:ssmith@pnnl.gov))

The copyright of individual parts of the supplement might differ from the CC BY 4.0 License.

## List of Figures

|            |                                                                                                                                                                                      |   |
|------------|--------------------------------------------------------------------------------------------------------------------------------------------------------------------------------------|---|
| Figure S1  | Total open burning emissions in 1980 by species. Color scale is the same for each emission species across all gridded figures for comparison. . . . .                                | 2 |
| Figure S2  | Total open burning emissions in 2015, average of previous 10-years, by species. Color scale is the same for each emission species across all gridded figures for comparison. . . . . | 2 |
| Figure S3  | Total open burning emissions in 2050 by species under the SSP2-45 scenario. Color scale is the same for each emission species across all gridded figures for comparison. . . . .     | 3 |
| Figure S4  | Total open burning emissions in 2100 by species under the SSP2-45 scenario. Color scale is the same for each emission species across all gridded figures for comparison. . . . .     | 3 |
| Figure S5  | Total open burning emissions in 2100 by species under the SSP1-26 scenario. Color scale is the same for each emission species across all gridded figures for comparison. . . . .     | 4 |
| Figure S6  | Total open burning emissions in 2100 by species under the SSP3-70 scenario. Color scale is the same for each emission species across all gridded figures for comparison. . . . .     | 4 |
| Figure S7  | Total anthropogenic emissions in 2050 by species under the SSP1-26 scenario. Color scale is the same for each emission species across all gridded figures for comparison. . . . .    | 5 |
| Figure S8  | Total anthropogenic emissions in 2100 by species under the SSP1-26 scenario. Color scale is the same for each emission species across all gridded figures for comparison. . . . .    | 5 |
| Figure S9  | Total anthropogenic emissions in 2050 by species under the SSP3-70 scenario. Color scale is the same for each emission species across all gridded figures for comparison. . . . .    | 6 |
| Figure S10 | Total anthropogenic emissions in 2100 by species under the SSP3-70 scenario. Color scale is the same for each emission species across all gridded figures for comparison. . . . .    | 6 |

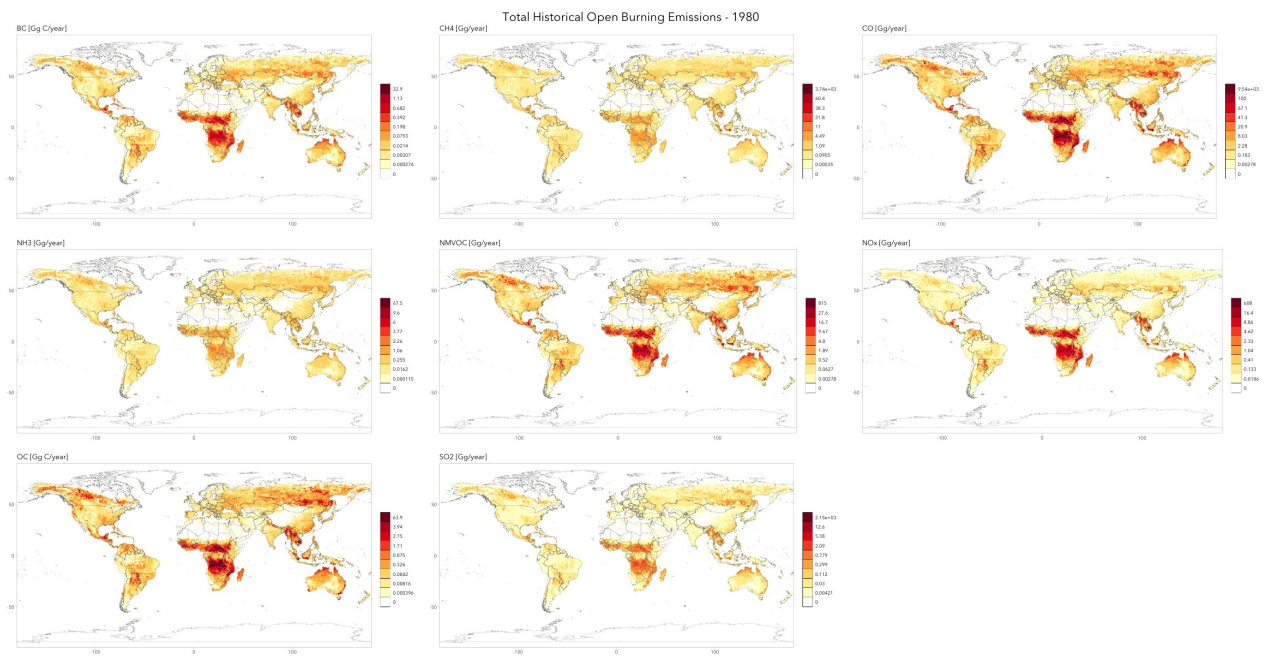

Figure S1: Total open burning emissions in 1980 by species. Color scale is the same for each emission species across all gridded figures for comparison.

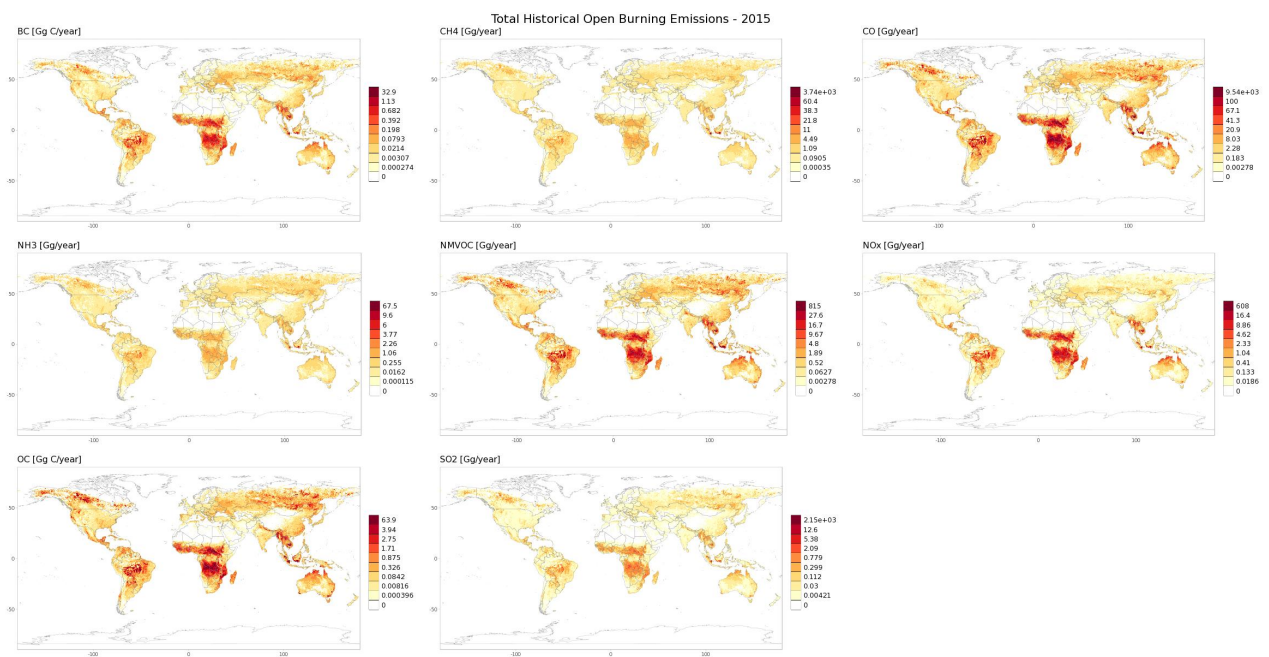

Figure S2: Total open burning emissions in 2015, average of previous 10-years, by species. Color scale is the same for each emission species across all gridded figures for comparison.

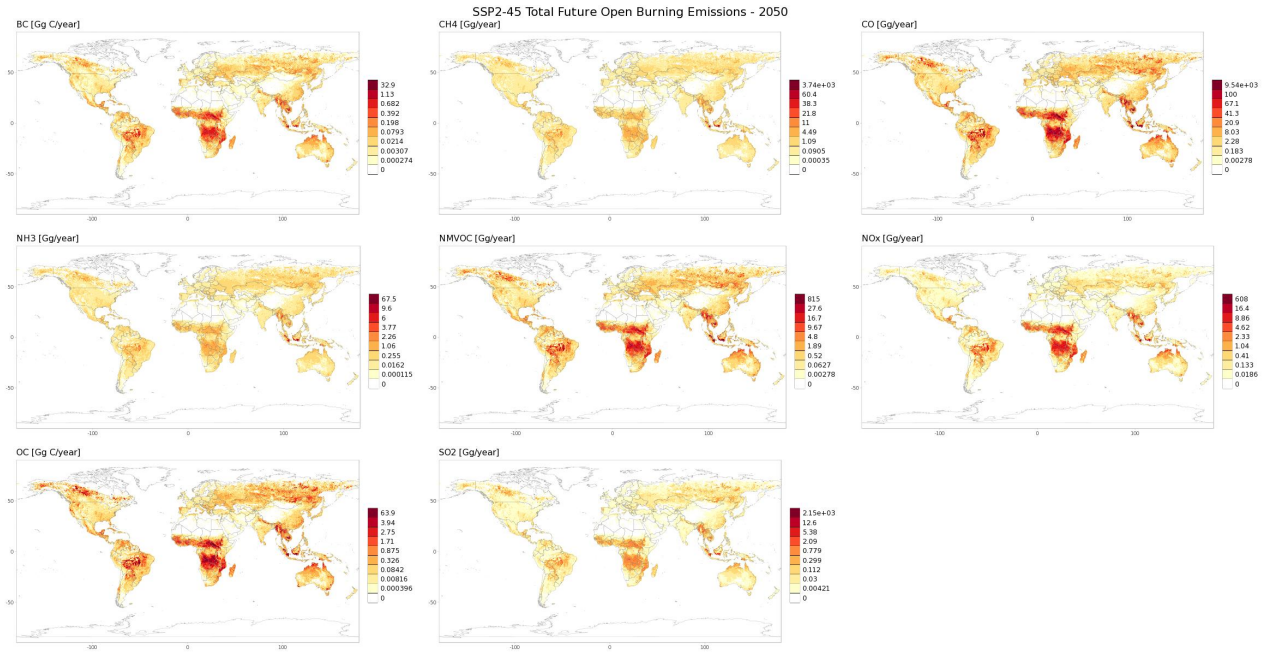

Figure S3: Total open burning emissions in 2050 by species under the SSP2-45 scenario. Color scale is the same for each emission species across all gridded figures for comparison.

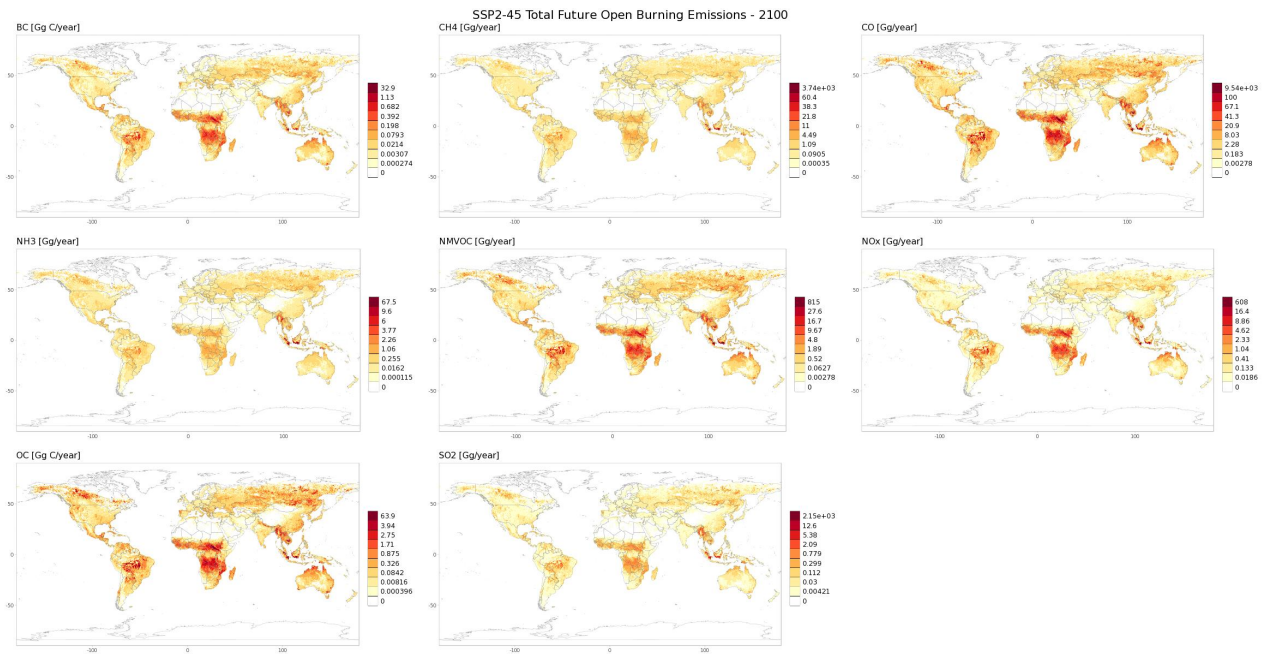

Figure S4: Total open burning emissions in 2100 by species under the SSP2-45 scenario. Color scale is the same for each emission species across all gridded figures for comparison.

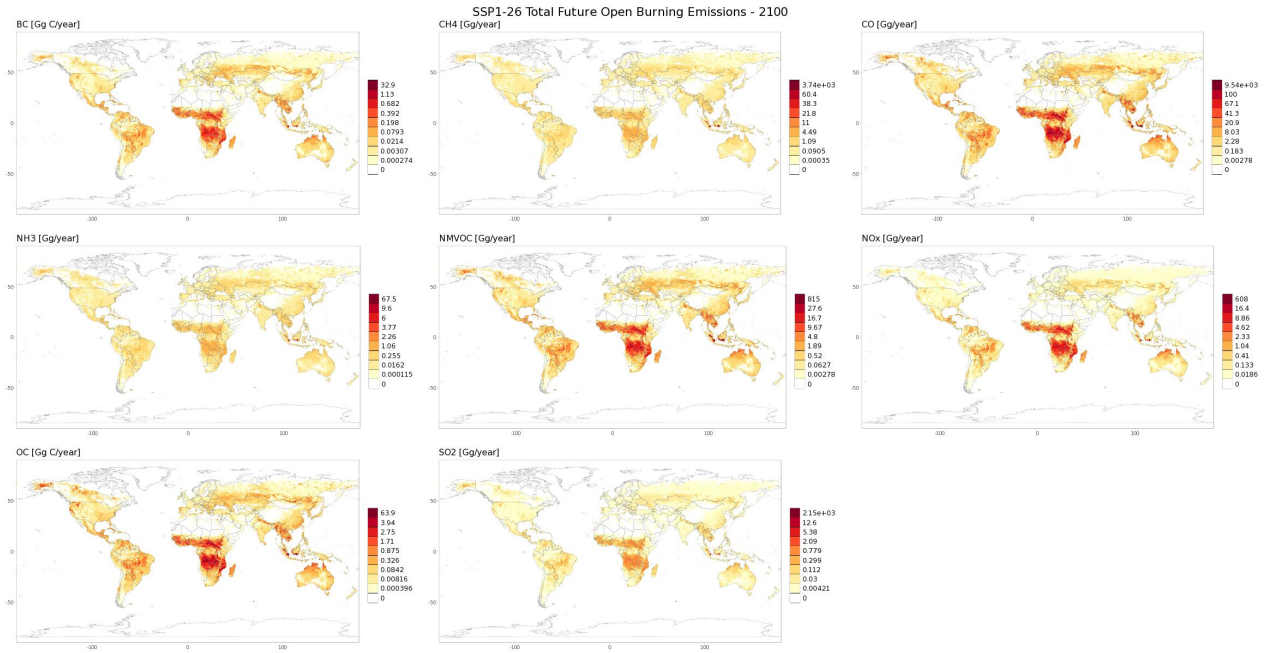

Figure S5: Total open burning emissions in 2100 by species under the SSP1-26 scenario. Color scale is the same for each emission species across all gridded figures for comparison.

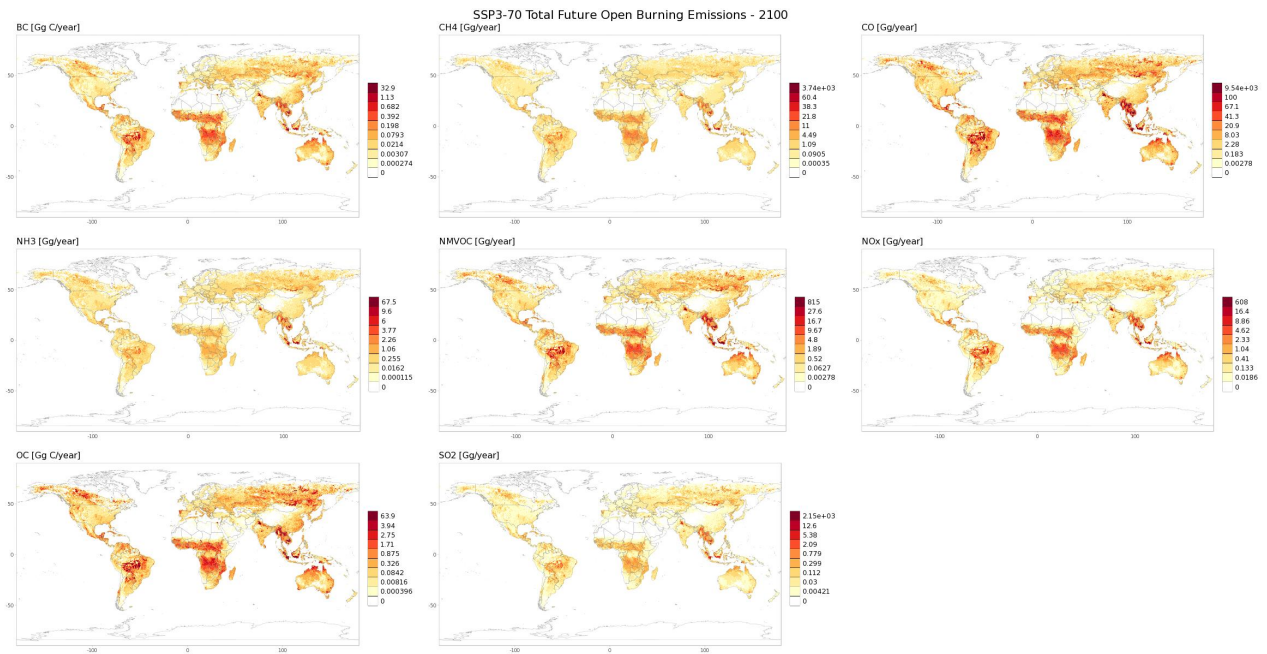

Figure S6: Total open burning emissions in 2100 by species under the SSP3-70 scenario. Color scale is the same for each emission species across all gridded figures for comparison.

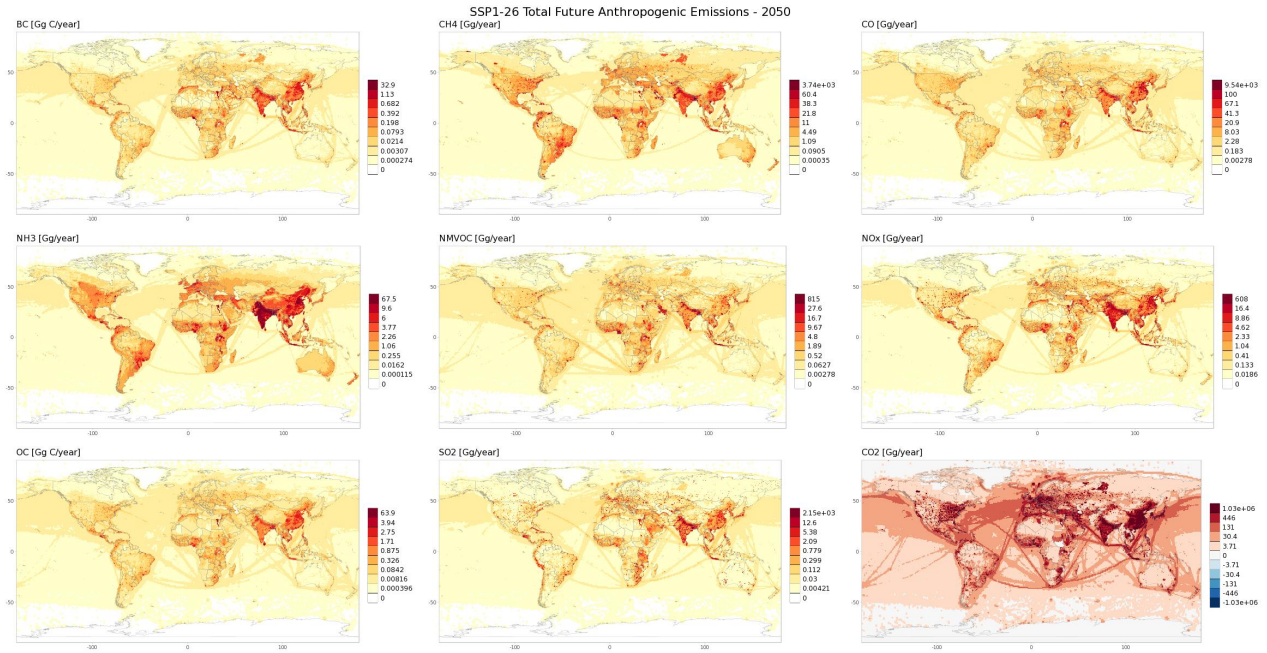

Figure S7: Total anthropogenic emissions in 2050 by species under the SSP1-26 scenario. Color scale is the same for each emission species across all gridded figures for comparison.

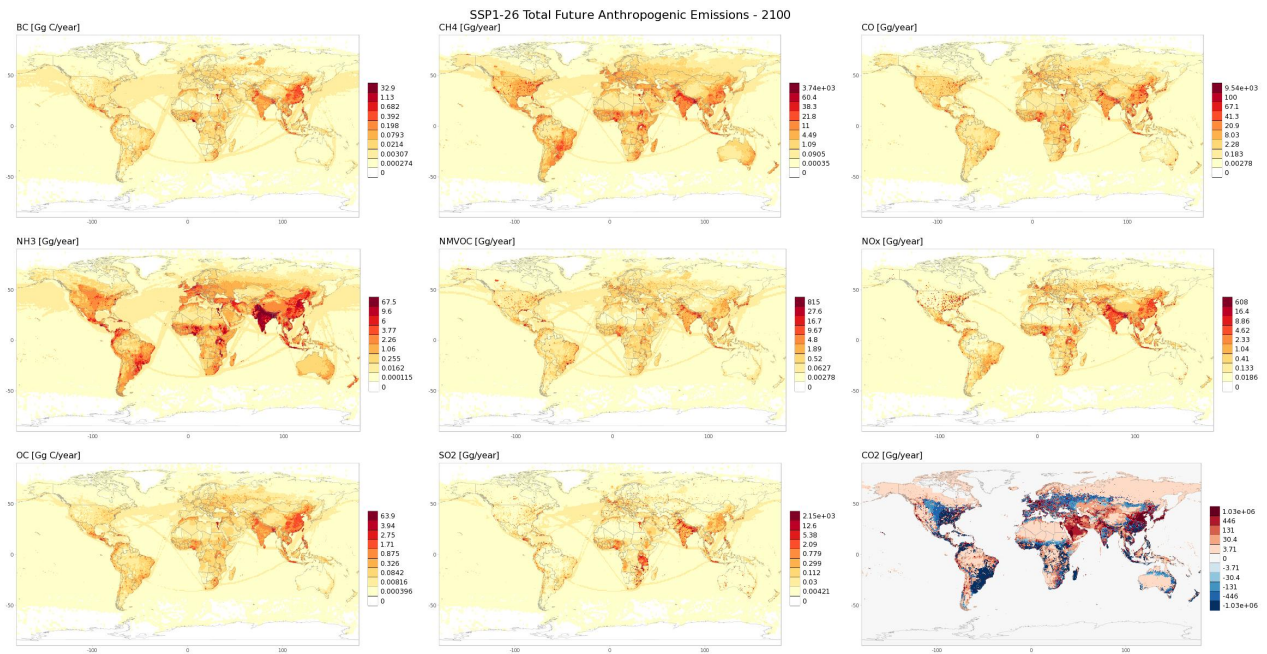

Figure S8: Total anthropogenic emissions in 2100 by species under the SSP1-26 scenario. Color scale is the same for each emission species across all gridded figures for comparison.

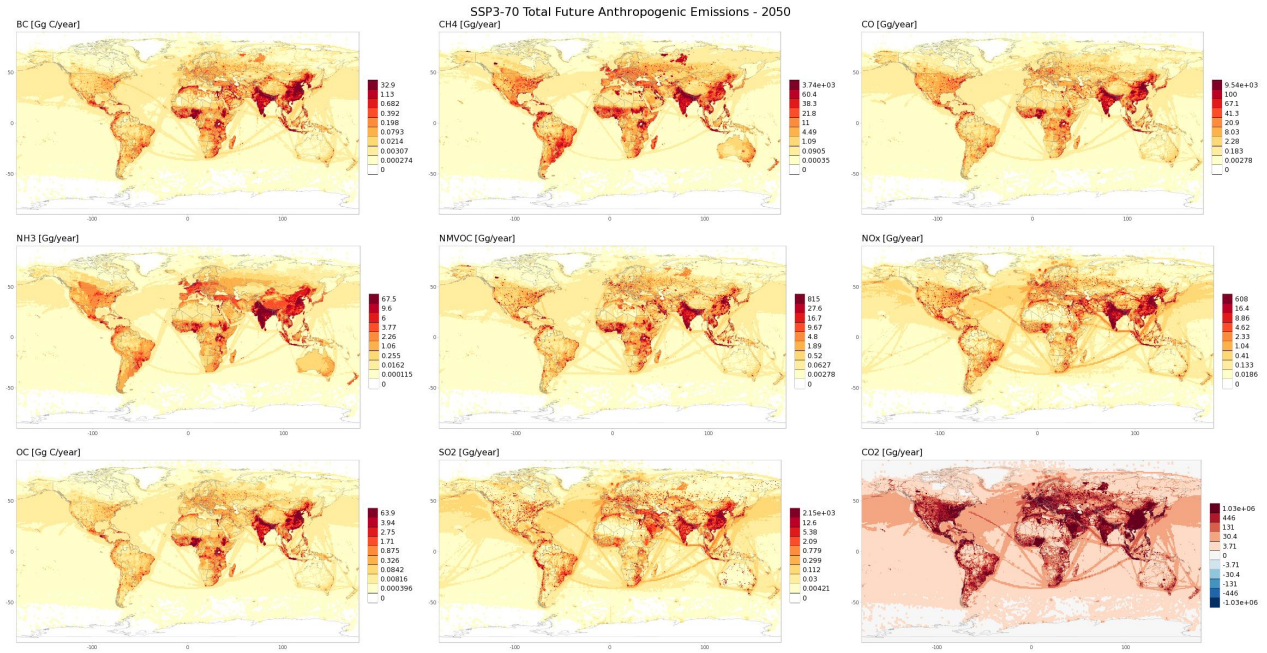

Figure S9: Total anthropogenic emissions in 2050 by species under the SSP3-70 scenario. Color scale is the same for each emission species across all gridded figures for comparison.

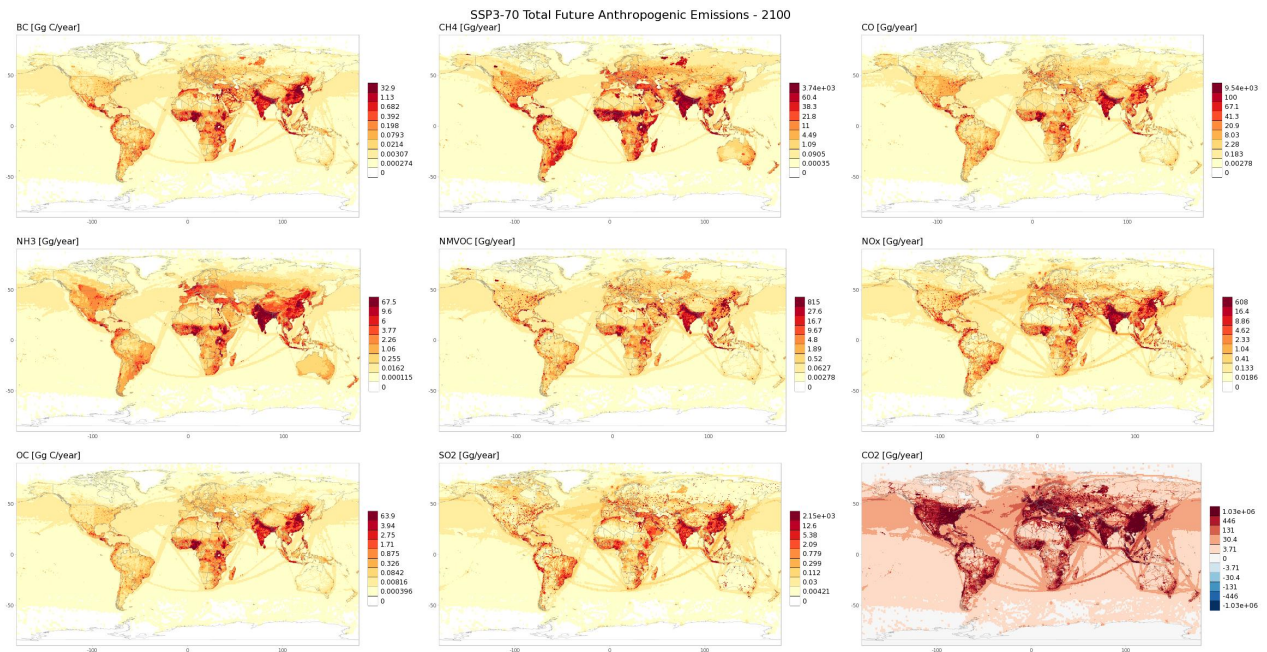

Figure S10: Total anthropogenic emissions in 2100 by species under the SSP3-70 scenario. Color scale is the same for each emission species across all gridded figures for comparison.
